# Supplementary material for: Application of Atmospheric-Pressure Jet Plasma in the Presence of Acrylic Acid for Joining Polymers without Adhesives
Source: MDPI journal article supplement (doi:10.3390/ma16072673), 2023-03-28
Supplement: s1 [file s1]

## Supporting Information

# Application of Atmospheric-Pressure Jet Plasma in the Presence of Acrylic Acid for Joining Polymers without Adhesives

Roman Günther <sup>1,2</sup>, Prof. Dr. Walter Remo Caseri <sup>2</sup>, Prof. Dr. Christof Brändli<sup>1\*</sup>

<sup>1</sup> Laboratory of Adhesives and Polymer Materials, Institute of Materials and Process Engineering, ZHAW Zurich University of Applied Sciences, 8401 Winterthur, Switzerland; guea@zhaw.ch

<sup>2</sup> Multifunctional Materials, Department of Materials, ETH Zürich, 8093 Zurich, Switzerland; walter.caseri@mat.ethz.ch

\* Correspondence: christof.braendli@zhaw.ch

## 2. Materials and Methods

### 2.7. Debonding Experiments

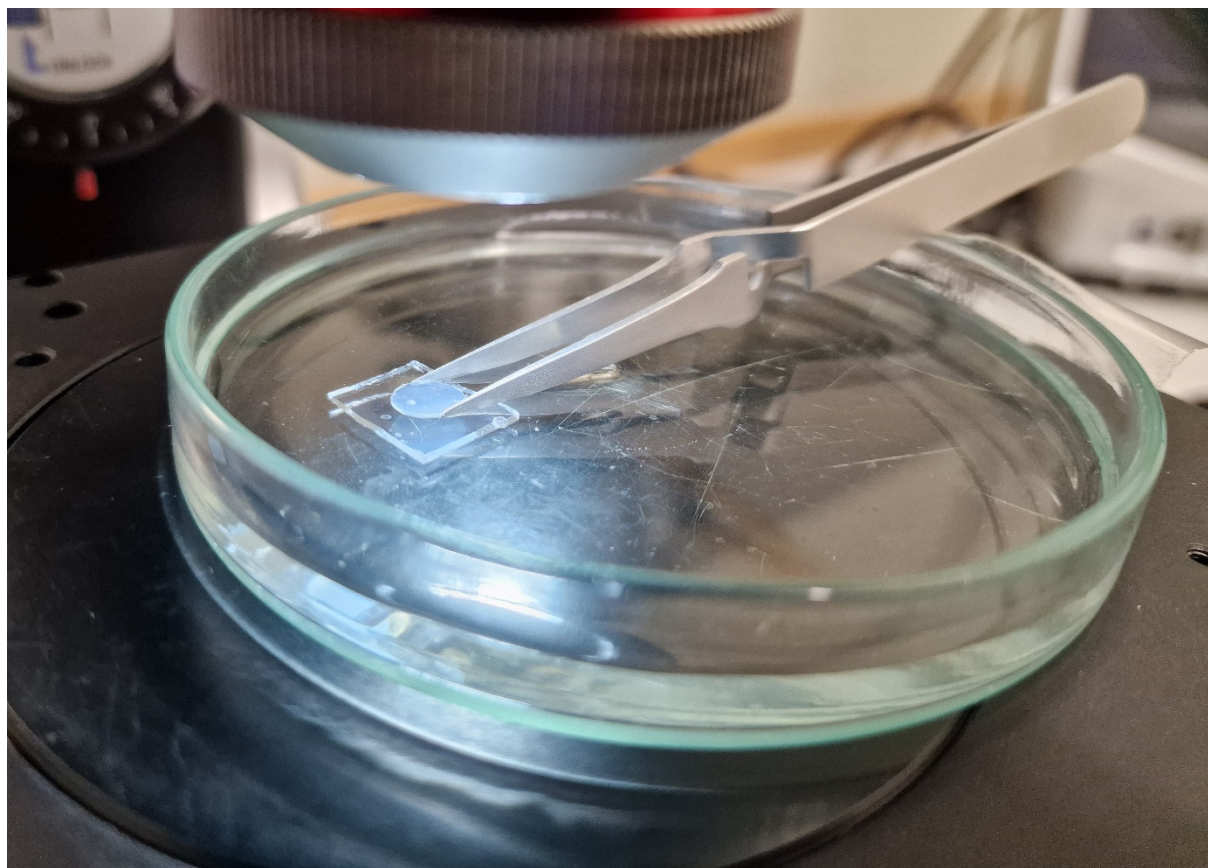

**Figure S1.** Experimental setup for the debonding experiments.

### 3. Results and Discussion

#### 3.3. Effect of Adsorbed Metal Ions on the Joints

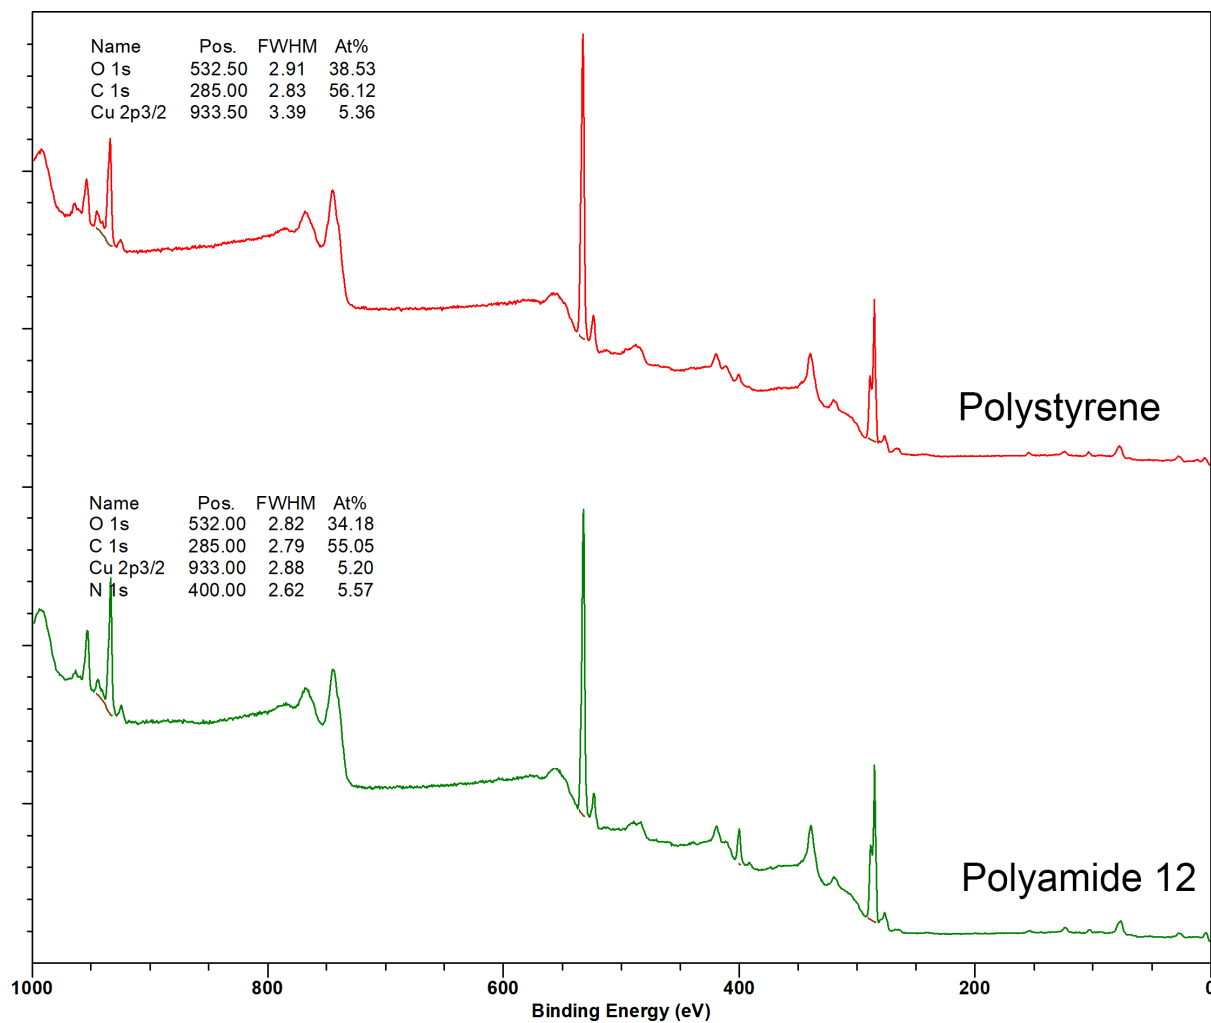

**Figure S2.** XPS survey spectra, utilized to quantify the copper present on the surfaces of PS and PA 12 after exposures to the copper ion solution.
